# Supplementary material for: Impact of length and width of footwear on foot structure of preschool-aged children
Source: PeerJ. 2022 May 3;10:e13403. doi: 10.7717/peerj.13403 (PMC9074857; doi:10.7717/peerj.13403)
Supplement: Supplemental Information 2 [file peerj-10-13403-s002.xls]

## Sheet: Arkusz1
No.	Sex	Body mass	Body height	BMI	foot length r	foot lenght l	foot width r	foot width l	Clarke's angle r		Clarke's angle l		γ angle r		γ angle l		α angle r		α angle l		β angle r		β angle l		length excess r		length excess l		width excess r		width excess l		use of the footwear
1	1	20	122	13.44	17	17	6.5	6.5	37	Normal foot	30	Normal foot	15	Normal foot	15	Normal foot	7	Normal setting	0	Normal setting	19	The Vth toe varus deformity	12	The Vth toe varus deformity	16	Too long	16	Too long	3	Appropriate	3	Appropriate	1
2	1	19	122	12.76	17.5	17.5	6.4	6.4	37	Normal foot	30	Normal foot	15	Normal foot	14	High arched foot	6	Normal setting	0	Normal setting	10	The Vth toe varus deformity	9	Normal setting	15	Too long	15	Too long	1	Appropriate	1	Appropriate	3
3	1	21	120	14.58	17	17	6.5	6.5	35	Normal foot	38	Normal foot	16	Normal foot	16	Normal foot	4	Normal setting	0	Normal setting	17	The Vth toe varus deformity	21	The Vth toe varus deformity	12	Appropriate	12	Appropriate	1	Appropriate	1	Appropriate	2.5
4	1	20	115	15.12	18	18	6.2	6.2	42	Normal foot	32	Normal foot	13	High arched foot	13	High arched foot	6	Normal setting	5	Normal setting	11	The Vth toe varus deformity	13	The Vth toe varus deformity	12	Appropriate	12	Appropriate	2	Appropriate	2	Appropriate	2
5	1	21	120	13.89	17	17	6.9	6.4	32	Normal foot	41	Normal foot	14	High arched foot	14	High arched foot	9	Normal setting	3	Normal setting	20	The Vth toe varus deformity	21	The Vth toe varus deformity	11	Appropriate	11	Appropriate	minus1	Too narrow	-0.5	Too narrow	2
6	1	20	119	14.12	17.5	17.5	6.5	6.5	41	Normal foot	38	Normal foot	15	Normal foot	16	Normal foot	5	Normal setting	3	Normal setting	9	Normal setting	20	The Vth toe varus deformity	15	Too long	15	Too long	4	Too wide	4	Too wide	2.5
7	1	19	115	14.37	17	17	6.2	6.2	37	Normal foot	37	Normal foot	15	Normal foot	15	Normal foot	7	Normal setting	7	Normal setting	15	The Vth toe varus deformity	15	The Vth toe varus deformity	12	Appropriate	12	Appropriate	2	Appropriate	2	Appropriate	1
8	1	20	122	13.44	17.5	17.5	6.1	6.1	43	Normal foot	45	Normal foot	15	Normal foot	15	Normal foot	0	Normal setting	0	Normal setting	9	Normal setting	9	Normal setting	14	Too long	14	Too long	2	Appropriate	2	Appropriate	1
9	1	24	120	16.67	16.5	16.5	6	6	47	Normal foot	47	Normal foot	14	High arched foot	14	High arched foot	0	Normal setting	0	Normal setting	20	The Vth toe varus deformity	20	The Vth toe varus deformity	7	Too short	7	Too short	minus 1	Too narrow	-1	Too narrow	3
10	1	21	123	13.88	17.5	17.5	6.5	6.5	32	Normal foot	32	Normal foot	16	Normal foot	16	Normal foot	9	Normal setting	9	Normal setting	7	Normal setting	7	Normal setting	12	Appropriate	12	Appropriate	2	Appropriate	2	Appropriate	3.5
11	1	20.8	124	13.52	18.5	18.5	7	7	42	Normal foot	42	Normal foot	18	Normal foot	16	Normal foot	0	Normal setting	0	Normal setting	12	The Vth toe varus deformity	17	The Vth toe varus deformity	12	Appropriate	12	Appropriate	2	Appropriate	2	Appropriate	2
12	1	23.4	118	16.8	17.6	17.6	6.9	6.8	34	Normal foot	34	Normal foot	16	Normal foot	16	Normal foot	1	Normal setting	2	Normal setting	12	The Vth toe varus deformity	15	The Vth toe varus deformity	12	Appropriate	12	Appropriate	2	Appropriate	2.1	Appropriate	3
13	1	21.6	118	15.51	18	18	6.9	6.9	30	Normal foot	37	Normal foot	17	Normal foot	17	Normal foot	1	Normal setting	1	Normal setting	14	The Vth toe varus deformity	10	The Vth toe varus deformity	11	Appropriate	11	Appropriate	1	Appropriate	1	Appropriate	1
14	1	19.3	115	14.59	17	17	6.5	6.5	46	Normal foot	42	Normal foot	16	Normal foot	16	Normal foot	10	Hallux valgus	10	Hallux valgus	16	The Vth toe varus deformity	20	The Vth toe varus deformity	10	Appropriate	10	Appropriate	minus 1	Too narrow	-1	Too narrow	1
15	1	21.1	120	14.65	17.4	17.4	7.1	7.4	41	Normal foot	41	Normal foot	20	Flat foot	20	Flat foot	0	Normal setting	6	Normal setting	23	The Vth toe varus deformity	23	The Vth toe varus deformity	13	Too long	13	Too long	4.3	Too wide	4	Too wide	2
16	1	20.1	120	13.96	17.6	17.6	7.2	7.2	47	Normal foot	47	Normal foot	18	Normal foot	19	Flat foot	9	Normal setting	4	Normal setting	20	The Vth toe varus deformity	25	The Vth toe varus deformity	12	Appropriate	12	Appropriate	3	Appropriate	3	Appropriate	2
17	1	20.1	114	15.47	16.3	16.3	7	7	24	Flat foot	24	Flat foot	20	Flat foot	18	Normal foot	9	Normal setting	1	Normal setting	0	Normal setting	17	The Vth toe varus deformity	14	Too long	14	Too long	4	Too wide	4	Too wide	1
18	1	23.6	120	16.39	18.7	18.7	7.6	7.7	32	Normal foot	32	Normal foot	17	Normal foot	16	Normal foot	12	Hallux valgus	7	Normal setting	5	Normal setting	10	The Vth toe varus deformity	10	Appropriate	10	Appropriate	4	Too wide	4	Too wide	3
19	1	21	120	14.58	17.6	17.6	6.7	6.5	50	High arched foot	50	High arched foot	19	Flat foot	18	Normal foot	4	Normal setting	0	Normal setting	9	Normal setting	14	The Vth toe varus deformity	6	Too short	6	Too short	minus 1	Too narrow	-1.2	Too narrow	4
20	1	23	117	16.8	17.1	17.1	7.2	7.2	18	Flat foot	25	Flat foot	16	Normal foot	17	Normal foot	0	Normal setting	0	Normal setting	10	The Vth toe varus deformity	16	The Vth toe varus deformity	13	Too long	13	Too long	4	Too wide	4	Too wide	2
21	1	26	123	17.18	19.3	19.3	8	8	34	Normal foot	34	Normal foot	18	Normal foot	18	Normal foot	0	Normal setting	2	Normal setting	15	The Vth toe varus deformity	15	The Vth toe varus deformity	10	Appropriate	10	Appropriate	2	Appropriate	2	Appropriate	2
22	1	21	112	16.74	16	16	6.7	6.7	17	Flat foot	17	Flat foot	19	Flat foot	19	Flat foot	0	Normal setting	0	Normal setting	21	The Vth toe varus deformity	21	The Vth toe varus deformity	15	Too long	15	Too long	4	Too wide	4	Too wide	1
23	1	24	119	16.95	17.9	17.9	7.4	7.4	25	Flat foot	25	Flat foot	19	Flat foot	20	Flat foot	0	Normal setting	0	Normal setting	20	The Vth toe varus deformity	20	The Vth toe varus deformity	13	Too long	13	Too long	4.5	Too wide	4.5	Too wide	3
24	1	21.9	113	17.15	16.2	16.2	7	7.3	37	Normal foot	37	Normal foot	20	Flat foot	20	Flat foot	0	Normal setting	0	Normal setting	18	The Vth toe varus deformity	10	The Vth toe varus deformity	11	Appropriate	11	Appropriate	3.5	Too wide	3.5	Too wide	2
25	1	23	117	16.8	17.5	17.5	6.4	6.6	38	Normal foot	30	Normal foot	15	Normal foot	16	Normal foot	1	Normal setting	13	Hallux valgus	20	The Vth toe varus deformity	11	The Vth toe varus deformity	12	Appropriate	12	Appropriate	3	Appropriate	3	Appropriate	2.5
26	1	25.5	123	16.85	17.6	17.6	7.1	7.1	30	Normal foot	30	Normal foot	17	Normal foot	17	Normal foot	6	Normal setting	0	Normal setting	17	The Vth toe varus deformity	14	The Vth toe varus deformity	9	Appropriate	9	Appropriate	2	Appropriate	2	Appropriate	1
27	1	27.6	127	17.11	19	19	7.5	7.5	39	Normal foot	39	Normal foot	19	Flat foot	19	Flat foot	9	Normal setting	1	Normal setting	12	The Vth toe varus deformity	13	The Vth toe varus deformity	11	Appropriate	11	Appropriate	3.5	Too wide	3.5	Too wide	2
28	1	23.8	119	16.81	17.8	17.8	7.2	7.2	26	Flat foot	26	Flat foot	19	Flat foot	19	Flat foot	0	Normal setting	0	Normal setting	15	The Vth toe varus deformity	15	The Vth toe varus deformity	13	Too long	13	Too long	4	Too wide	4	Too wide	2
29	1	20.9	119	14.76	17.2	17.2	7.5	7.5	19	Flat foot	15	Flat foot	19	Flat foot	22	Flat foot	7	Normal setting	10	Hallux valgus	20	The Vth toe varus deformity	17	The Vth toe varus deformity	14	Too long	14	Too long	4.2	Too wide	4.2	Too wide	1
30	1	21.8	117	15.92	18.7	18.7	6.7	6.7	25	Flat foot	20	Flat foot	14	High arched foot	14	High arched foot	4	Normal setting	4	Normal setting	7	Normal setting	7	Normal setting	13	Too long	13	Too long	minus 1	Too narrow	-1	Too narrow	2.5
31	1	16.4	107	14.32	15.8	15.8	6.2	6.2	40	Normal foot	31	Normal foot	18	Normal foot	17	Normal foot	0	Normal setting	0	Normal setting	16	The Vth toe varus deformity	16	The Vth toe varus deformity	12	Appropriate	12	Appropriate	2	Appropriate	2	Appropriate	3
32	1	27.5	127	17.05	19	19	7.6	7.6	43	Normal foot	31	Normal foot	17	Normal foot	17	Normal foot	0	Normal setting	0	Normal setting	3	Normal setting	20	The Vth toe varus deformity	12	Appropriate	12	Appropriate	2	Appropriate	2	Appropriate	2
33	1	22.8	118	16.37	18.6	18.6	6.7	6.9	16	Flat foot	16	Flat foot	13	High arched foot	16	Normal foot	8	Normal setting	12	Hallux valgus	4	Normal setting	10	The Vth toe varus deformity	15	Too long	15	Too long	2.2	Appropriate	2	Appropriate	2
34	1	21.5	117	15.7	17.5	17.5	7.1	7.1	45	Normal foot	45	Normal foot	19	Flat foot	19	Flat foot	0	Normal setting	0	Normal setting	25	The Vth toe varus deformity	18	The Vth toe varus deformity	12	Appropriate	12	Appropriate	3.7	To wide	3.7	To wide	1
35	1	19.8	113	15.51	16.7	16.7	6.5	6.5	36	Normal foot	27	Flat foot	19	Flat foot	19	Flat foot	5	Normal setting	2	Normal setting	13	The Vth toe varus deformity	18	The Vth toe varus deformity	8	Appropriate	8	Appropriate	3.5	Too wide	3.5	Too wide	2
36	1	25.5	122	17.13	19	18	7.5	7	40	Normal foot	38	Normal foot	18	Normal foot	18	Normal foot	6	Normal setting	8	Normal setting	19	The Vth toe varus deformity	15	The Vth toe varus deformity	9	Appropriate	9	Appropriate	1	Appropriate	1.5	Appropriate	2
37	1	18.7	115	14.13	17	17	6.5	6.5	48	Normal foot	34	Normal foot	17	Normal foot	15	Normal foot	10	Hallux valgus	4	Normal setting	0	Normal setting	0	Normal setting	10	Appropriate	10	Appropriate	2	Appropriate	2	Appropriate	2.5
38	1	22.7	121	15.5	18	18.5	7	7	49	Normal foot	41	Normal foot	15	Normal foot	15	Normal foot	4	Normal setting	6	Normal setting	12	The Vth toe varus deformity	16	The Vth toe varus deformity	11	Appropriate	11	Appropriate	2.2	Appropriate	2.2	Appropriate	3
39	1	22	121	15.03	19	19	7	6.5	55	High arched foot	51	High arched foot	16	Normal foot	14	High arched foot	0	Normal setting	0	Normal setting	15	The Vth toe varus deformity	11	The Vth toe varus deformity	6	Too short	6	Too short	minus 1	Too narrow	-1.5	Too narrow	1
40	1	20.5	110	16.94	17.5	17.5	6.5	7	69	High arched foot	54	High arched foot	20	Flat foot	20	Flat foot	3	Normal setting	7	Normal setting	16	The Vth toe varus deformity	12	The Vth toe varus deformity	7	Too short	7	Too short	3.3	Too wide	3.3	Too wide	2
41	1	21.6	118	15.51	17.5	17.5	6.5	7	17	Flat foot	20	Flat foot	16	Normal foot	16	Normal foot	3	Normal setting	5	Normal setting	6	Normal setting	14	The Vth toe varus deformity	13	Too long	13	Too long	2.5	Appropriate	2	Appropriate	1
42	1	24.4	120	14.17	18.5	18.5	7	7	19	Flat foot	24	Flat foot	18	Normal foot	15	Normal foot	0	Normal setting	0	Normal setting	19	The Vth toe varus deformity	12	The Vth toe varus deformity	15	Too long	15	Too long	3	Appropriate	3	Appropriate	1
43	1	20.3	124	13.2	18.5	18.5	6.5	6	49	Normal foot	49	Normal foot	13	High arched foot	14	High arched foot	0	Normal setting	9	Normal setting	24	The Vth toe varus deformity	15	The Vth toe varus deformity	12	Appropriate	12	Appropriate	minus 0,5	Too narrow	1	Appropriate	2
44	1	21.3	123	14.08	17.5	17.5	7	7.5	49	Normal foot	49	Normal foot	19	Flat foot	20	Normal foot	0	Normal setting	7	Normal setting	10	The Vth toe varus deformity	14	The Vth toe varus deformity	11	Appropriate	11	Appropriate	4.5	Too wide	4	Too wide	2.5
45	1	23.4	120	16.25	18	17	6.5	6.5	31	Normal foot	15	Flat foot	17	Normal foot	18	Normal foot	5	Normal setting	6	Normal setting	19	The Vth toe varus deformity	21	The Vth toe varus deformity	8	Appropriate	8	Appropriate	2	Appropriate	2	Appropriate	2
46	1	20.6	118	14.79	16.5	16.5	6.5	6.5	49	Normal foot	43	Normal foot	14	High arched foot	18	Normal foot	0	Normal setting	7	Normal setting	6	Normal setting	6	Normal setting	11	Appropriate	11	Appropriate	2	Appropriate	2	Appropriate	2
47	1	24.9	120	17.29	17	17.5	7	7	62	High arched foot	43	Normal foot	20	Flat foot	19	Flat foot	5	Normal setting	6	Normal setting	23	The Vth toe varus deformity	20	The Vth toe varus deformity	10	Appropriate	9.5	Appropriate	3.4	Too wide	3.4	Too wide	2
48	1	20	119	14.12	18	17.5	7.5	7	43	Normal foot	10	Flat foot	19	Flat foot	19	Flat foot	9	Normal setting	9	Normal setting	16	The Vth toe varus deformity	20	The Vth toe varus deformity	8	Appropriate	8.5	Appropriate	3.5	Too wide	4	Too wide	2.5
49	1	18.5	110	15.29	16.5	16.5	6	6	46	Normal foot	58	High arched foot	15	Normal foot	15	Normal foot	0	Normal setting	0	Normal setting	7	Normal setting	15	The Vth toe varus deformity	10	Appropriate	10	Appropriate	2.5	Appropriate	2.5	Appropriate	1
50	1	20.7	117	15.12	18	17.5	6.5	6.5	31	Normal foot	53	High arched foot	15	Normal foot	16	Normal foot	7	Normal setting	0	Normal setting	6	Normal setting	16	The Vth toe varus deformity	11	Appropriate	11.5	Appropriate	2.3	Appropriate	2.3	Appropriate	2
1	2	25	128	15.25	17.5	17.5	6.6	6.6	35	Normal foot	35	Normal foot	17	Normal foot	17	Normal foot	5	Normal setting	5	Normal setting	18	The Vth toe varus deformity	18	The Vth toe varus deformity	12	Appropriate	12	Appropriate	1	Appropriate	1	Appropriate	2
2	2	29	125	17.28	17	17	6.6	6.7	43	Normal foot	43	Normal foot	14	High arched foot	16	Normal foot	5	Normal setting	5	Normal setting	18	The Vth toe varus deformity	18	The Vth toe varus deformity	12	Appropriate	12	Appropriate	minus 0,1	Too narrow	1	Appropriate	2
3	2	25	122	16.79	17.6	17.6	6.3	6.5	33	Normal foot	38	Normal foot	16	Normal foot	18	Normal foot	5	Normal setting	0	Normal setting	13	The Vth toe varus deformity	20	The Vth toe varus deformity	11	Appropriate	11	Appropriate	2.2	Appropriate	2	Appropriate	1
4	2	22	120	15.28	18.5	18.5	6.7	6.7	47	High arched foot	37	Normal foot	15	Normal foot	15	Normal foot	0	Normal setting	0	Normal setting	20	The Vth toe varus deformity	19	The Vth toe varus deformity	10	Appropriate	10	Appropriate	1	Appropriate	1	Appropriate	1.5
5	2	24	125	15.36	17.6	17.6	6.7	6.7	36	Normal foot	30	Normal foot	17	Normal foot	15	Normal foot	11	Hallux valgus	11	Hallux valgus	16	The Vth toe varus deformity	8	Normal setting	12	Appropriate	12	Appropriate	1	Appropriate	1	Appropriate	1
6	2	21	122	14.11	17.7	17.7	6.6	6.6	40	Normal foot	32	Normal foot	17	Normal foot	17	Normal foot	0	Normal setting	0	Normal setting	16	The Vth toe varus deformity	16	The Vth toe varus deformity	10	Appropriate	10	Appropriate	1	Appropriate	1	Appropriate	1.5
7	2	23	124	14.96	17.7	17.7	6.6	6.6	43	Normal foot	30	Normal foot	15	Normal foot	15	Normal foot	3	Normal setting	9	Normal setting	17	The Vth toe varus deformity	13	The Vth toe varus deformity	12	Appropriate	12	Appropriate	1	Appropriate	1	Appropriate	2
8	2	26	122	17.47	17.5	17.5	6	6	32	Normal foot	32	Normal foot	14	High arched foot	14	High arched foot	0	Normal setting	2	Normal setting	12	The Vth toe varus deformity	12	The Vth toe varus deformity	10	Appropriate	10	Appropriate	minus 2	Too narrow	-2	Too narrow	3
9	2	25	126	15.75	17.5	17.5	6.3	6.3	44	Normal foot	40	Normal foot	14	High arched foot	14	High arched foot	5	Normal setting	3	Normal setting	17	The Vth toe varus deformity	17	The Vth toe varus deformity	10	Appropriate	10	Appropriate	minus 1,5	Too narrow	-1.5	Too narrow	2.5
10	2	24	128	14.65	17.2	17.2	6.8	6.8	30	Normal foot	26	Normal foot	18	Normal foot	18	Normal foot	10	Hallux valgus	10	Hallux valgus	11	The Vth toe varus deformity	13	The Vth toe varus deformity	12	Appropriate	12	Appropriate	2	Appropriate	2	Appropriate	2
11	2	23	122	15.45	18.5	18.5	7.3	7.5	32	Normal foot	32	Normal foot	17	Normal foot	17	Normal foot	0	Normal setting	3	Normal setting	12	The Vth toe varus deformity	12	The Vth toe varus deformity	12	Appropriate	12	Appropriate	1.8	Appropriate	2	Appropriate	2
12	2	24.8	123	16.39	17	17	7.4	7.4	39	Normal foot	43	Normal foot	21	Flat foot	19	Flat foot	0	Normal setting	0	Normal setting	14	The Vth toe varus deformity	14	The Vth toe varus deformity	10	Appropriate	10	Appropriate	3.5	Too wide	3.5	Too wide	3
13	2	22.2	115	16.79	17.5	17.5	7.2	7.3	10	Flat foot	13	Flat foot	16	Normal foot	19	Flat foot	0	Normal setting	3	Normal setting	12	The Vth toe varus deformity	12	The Vth toe varus deformity	16	Too long	16	Too long	3.4	Too wide	3.3	Too wide	1.5
14	2	23	118	16.52	17.8	17.8	7.2	7.3	20	Normal foot	20	Normal foot	19	Flat foot	19	Flat foot	4	Normal setting	5	Normal setting	17	The Vth toe varus deformity	12	The Vth toe varus deformity	8	Appropriate	8	Appropriate	3.4	Too wide	3.5	Too wide	2
15	2	18.6	115	14.06	16.5	16.5	6.2	6.2	16	Flat foot	16	Flat foot	16	Normal foot	14	High arched foot	0	Normal setting	0	Normal setting	14	The Vth toe varus deformity	13	The Vth toe varus deformity	15	Too long	15	Too long	3	Appropriate	3	Appropriate	2
16	2	21.8	118	15.65	18	18	7	7	26	Normal foot	26	Normal foot	15	Normal foot	15	Normal foot	2	Normal setting	2	Normal setting	10	The Vth toe varus deformity	10	The Vth toe varus deformity	12	Appropriate	12	Appropriate	2	Appropriate	2	Appropriate	2.5
17	2	22.7	120	15.76	17.1	17.1	7	6.8	23	Normal foot	31	Normal foot	19	Flat foot	17	Normal foot	6	Normal setting	2	Normal setting	24	The Vth toe varus deformity	17	The Vth toe varus deformity	11	Appropriate	11	Appropriate	3.2	Too wide	3	Appropriate	2
18	2	21.5	115	16.26	17	17	6.5	6.5	15	Flat foot	10	Flat foot	16	Normal foot	17	Normal foot	0	Normal setting	0	Normal setting	16	The Vth toe varus deformity	20	The Vth toe varus deformity	14	Too long	14	Too long	3	Appropriate	3	Appropriate	2
19	2	27	126	17	18.5	18.5	7.5	7.5	13	Flat foot	28	Normal foot	20	Flat foot	20	Flat foot	6	Normal setting	0	Normal setting	20	The Vth toe varus deformity	20	The Vth toe varus deformity	15	Too long	15	Too long	3.6	Too wide	3.6	Too wide	1
20	2	23.4	123	15.47	17.7	17.7	7.1	7	45	High arched foot	45	High arched foot	18	Normal foot	16	Normal foot	0	Normal setting	8	Normal setting	16	The Vth toe varus deformity	16	The Vth toe varus deformity	7	Too short	7	Too short	1.9	Appropriate	2	Appropriate	1.5
21	2	18.5	112	14.75	16.5	16.5	7	7	17	Normal foot	17	Flat foot	19	Flat foot	20	Flat foot	10	Hallux valgus	2	Normal setting	20	The Vth toe varus deformity	20	The Vth toe varus deformity	15	Too long	15	Too long	4	Too wide	4	Too wide	2
22	2	27	131	15.73	19.5	19.5	7.5	7.5	23	Normal foot	15	Flat foot	15	Normal foot	15	Normal foot	8	Normal setting	8	Normal setting	10	The Vth toe varus deformity	17	The Vth toe varus deformity	13	Too long	13	Too long	2	Appropriate	2	Appropriate	3
23	2	27.5	128	16.78	18.7	18.7	7.3	7.3	31	Normal foot	30	Normal foot	17	Normal foot	17	Normal foot	7	Normal setting	9	Normal setting	15	The Vth toe varus deformity	10	The Vth toe varus deformity	12	Appropriate	12	Appropriate	1	Appropriate	1	Appropriate	3.5
24	2	24	122	16.12	18.7	18.7	7.9	7.8	15	Flat foot	15	Flat foot	18	Normal foot	20	Flat foot	0	Normal setting	6	Normal setting	11	The Vth toe varus deformity	16	The Vth toe varus deformity	16	Too long	16	Too long	3	Appropriate	2.9	Appropriate	2
25	2	25.8	126	16.25	19.1	19.1	7	7	6	Flat foot	22	Normal foot	14	High arched foot	14	High arched foot	0	Normal setting	0	Normal setting	10	The Vth toe varus deformity	7	Normal setting	15	Too long	15	Too long	minus 1	Too narrow	-1	Too narrow	1
26	2	24	119	16.95	17.7	17.7	7.1	7.3	16	Flat foot	13	Flat foot	17	Normal foot	15	Normal foot	8	Normal setting	5	Normal setting	20	The Vth toe varus deformity	19	The Vth toe varus deformity	16	Too long	16	Too long	2	Appropriate	1.8	Appropriate	1
27	2	22	120	15.28	17	17	7	7	30	Normal foot	12	Flat foot	18	Normal foot	20	Flat foot	6	Normal setting	7	Normal setting	6	Normal setting	17	The Vth toe varus deformity	13	Too long	13	Too long	3	Appropriate	3	Appropriate	3.5
28	2	26	124	16.91	18	18	6.5	6.5	37	Normal foot	27	Normal foot	15	Normal foot	15	Normal foot	8	Normal setting	4	Normal setting	0	Normal setting	0	Normal setting	12	Appropriate	12	Appropriate	2	Appropriate	2	Appropriate	2
29	2	26	125	16.64	18.5	18.5	7.3	7.3	9	Flat foot	9	Flat foot	19	Flat foot	19	Flat foot	0	Normal setting	0	Normal setting	15	The Vth toe varus deformity	5	Normal setting	15	Too long	15	Too long	3.5	Too wide	3.5	Too wide	2.5
30	2	20	116	14.86	17	17	6.6	6.6	32	Normal foot	40	Normal foot	18	Normal foot	18	Normal foot	5	Normal setting	5	Normal setting	0	Normal setting	0	Normal setting	11	Appropriate	11	Appropriate	2	Appropriate	2	Appropriate	1
31	2	20	118	14.36	18.2	18.2	7	7	16	Flat foot	15	Flat foot	18	Normal foot	18	Normal foot	5	Normal setting	8	Normal setting	18	The Vth toe varus deformity	7	Normal setting	13	Too long	13	Too long	3	Appropriate	3	Appropriate	2
32	2	23	117	16.8	17	17	6.5	6.5	35	Normal foot	35	Normal foot	16	Normal foot	16	Normal foot	0	Normal setting	0	Normal setting	22	The Vth toe varus deformity	20	The Vth toe varus deformity	12	Appropriate	12	Appropriate	2	Appropriate	2	Appropriate	3.5
33	2	23	118	16.52	18.5	18.5	7.5	7.5	28	Normal foot	28	Normal foot	16	Normal foot	16	Normal foot	5	Normal setting	5	Normal setting	5	Normal setting	5	Normal setting	12	Appropriate	12	Appropriate	2.2	Appropriate	2.2	Appropriate	2
34	2	21	123	14.34	16.1	16.1	6.5	6.5	34	Normal foot	20	Normal foot	18	Normal foot	16	Normal foot	0	Normal setting	4	Normal setting	10	The Vth toe varus deformity	12	The Vth toe varus deformity	11	Appropriate	11	Appropriate	2.5	Appropriate	2.5	Appropriate	2
35	2	18.5	112	14.75	15.9	15.9	6.5	6.5	42	Normal foot	33	Normal foot	16	Normal foot	16	Normal foot	6	Normal setting	5	Normal setting	10	The Vth toe varus deformity	10	The Vth toe varus deformity	12	Appropriate	12	Appropriate	2.4	Appropriate	2.4	Appropriate	1
36	2	22	119	15.53	17	17	6.8	7	45	High arched foot	47	High arched foot	20	Flat foot	20	Flat foot	12	Hallux valgus	9	Normal setting	2	Normal setting	11	The Vth toe varus deformity	7	Too short	7	Too short	3.5	Too wide	3.7	Too wide	3
37	2	18.5	112	14.75	15.9	15.9	6.5	6.5	42	Normal foot	33	Normal foot	16	Normal foot	16	Normal foot	6	Normal setting	5	Normal setting	10	The Vth toe varus deformity	10	The Vth toe varus deformity	8	Appropriate	8	Appropriate	2.6	Appropriate	2.6	Appropriate	2
38	2	22	119	15.53	17	17	6.8	7	45	High arched foot	45	High arched foot	20	Flat foot	20	Flat foot	12	Hallux valgus	9	Normal setting	2	Normal setting	11	The Vth toe varus deformity	7	Too short	7	Too short	3.8	Too wide	4	Too wide	2
39	2	23.7	125	15.7	19.8	19.8	7.7	8.2	20	Normal foot	4	Flat foot	18	Normal foot	17	Normal foot	4	Normal setting	5	Normal setting	12	The Vth toe varus deformity	14	The Vth toe varus deformity	14	Too long	14	Too long	3	Appropriate	2.5	Appropriate	1.5
40	2	20.8	119	14.69	17.5	17.5	6.4	6.6	36	Normal foot	26	Normal foot	16	Normal foot	17	Normal foot	0	Normal setting	0	Normal setting	16	The Vth toe varus deformity	20	The Vth toe varus deformity	12	Appropriate	12	Appropriate	2.2	Appropriate	2	Appropriate	2
41	2	20.1	118	14.43	17.8	17.8	7	7	22	Normal foot	24	Normal foot	20	Flat foot	20	Flat foot	0	Normal setting	0	Normal setting	11	The Vth toe varus deformity	11	The Vth toe varus deformity	11	Appropriate	11	Appropriate	3.6	Too wide	3.6	Too wide	1
42	2	22.3	124	14.5	18.8	18.8	7.6	7.6	37	Normal foot	25	Normal foot	18	Normal foot	18	Normal foot	3	Normal setting	9	Normal setting	11	The Vth toe varus deformity	14	The Vth toe varus deformity	10	Appropriate	10	Appropriate	2.4	Appropriate	2.4	Appropriate	1
43	2	25.6	125	16.38	19.3	19.3	8	7.8	41	Normal foot	35	Normal foot	17	Normal foot	17	Normal foot	5	Normal setting	4	Normal setting	22	The Vth toe varus deformity	16	The Vth toe varus deformity	10	Appropriate	10	Appropriate	2.4	Appropriate	2.6	Appropriate	2.5
44	2	23.1	118	16.59	18.5	18.5	7.5	7.5	18	Flat foot	22	Normal foot	17	Normal foot	15	Normal foot	9	Normal setting	5	Normal setting	13	The Vth toe varus deformity	13	The Vth toe varus deformity	14	Too long	14	Too long	3	Appropriate	3	Appropriate	3
45	2	20	113	15.66	16.3	16.3	6.7	6.7	23	Normal foot	30	Normal foot	20	Flat foot	16	Normal foot	1	Normal setting	0	Normal setting	20	The Vth toe varus deformity	16	The Vth toe varus deformity	10	Appropriate	10	Appropriate	3.2	Too wide	3.2	Too wide	3.5
46	2	23.1	121	15.78	18.5	18.5	7.3	7.5	27	Normal foot	15	Flat foot	18	Normal foot	18	Normal foot	0	Normal setting	3	Normal setting	16	The Vth toe varus deformity	11	The Vth toe varus deformity	15	Too long	15	Too long	2.5	Appropriate	2.7	Appropriate	2
47	2	21.4	119	14.62	18.3	18.3	7.4	7.4	29	Normal foot	17	Flat foot	18	Normal foot	18	Normal foot	1	Normal setting	7	Normal setting	14	The Vth toe varus deformity	17	The Vth toe varus deformity	15	Too long	15	Too long	2.7	Appropriate	2.7	Appropriate	1.5
48	2	22	117	16.07	17.7	17.7	6.9	6.9	27	Normal foot	22	Normal foot	18	Normal foot	18	Normal foot	1	Normal setting	2	Normal setting	22	The Vth toe varus deformity	22	The Vth toe varus deformity	12	Appropriate	12	Appropriate	2.5	Appropriate	2.5	Appropriate	2
49	2	23.9	125	15.3	18.5	18.5	7.3	7.5	16	Flat foot	10	Flat foot	16	Normal foot	18	Normal foot	2	Normal setting	10	Hallux valgus	11	The Vth toe varus deformity	20	The Vth toe varus deformity	14	Too long	14	Too long	2.7	Appropriate	2.5	Appropriate	1.5
50	2	20.4	115	15.42	16.7	16.7	7.5	7.5	25	Normal foot	23	Normal foot	19	Flat foot	19	Flat foot	0	Normal setting	0	Normal setting	15	The Vth toe varus deformity	12	The Vth toe varus deformity	12	Appropriate	12	Appropriate	3.4	Too wide	3.4	Too wide	2

## Sheet: Arkusz3
				s
